# Supplementary material for: Antimicrobial Activity of Sertraline on Listeria monocytogenes
Source: MDPI journal article supplement (doi:10.3390/ijms24054678), 2023-02-28
Supplement: s1 [file s1]

## Supplementary Material

**Supplementary Figure S1.** The relationship between percentage of living cells and relative fluorescence intensity. (A) *Listeria monocytogenes* ATCC 11915; (B) *Listeria monocytogenes* 001.

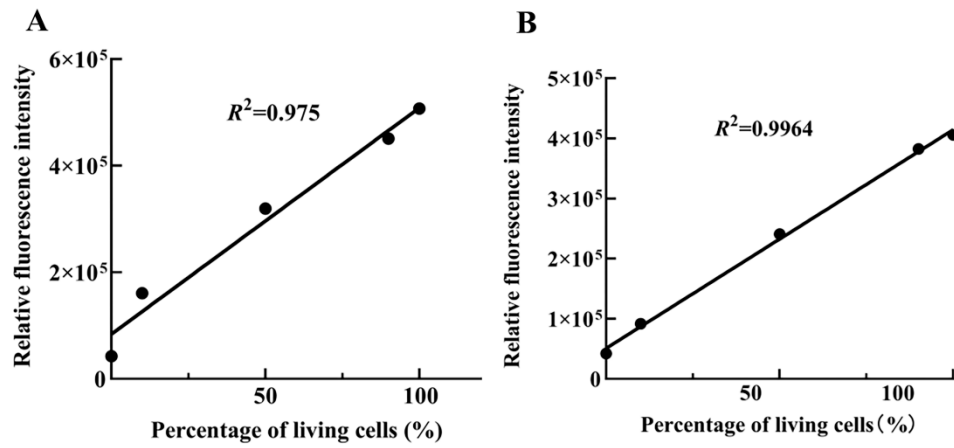

**Table S1.** Primers used in quantitative real-time PCR transcriptional analysis.

| Gene           | Nucleotide sequence                                    | Amplicon size<br>(bp) |
|----------------|--------------------------------------------------------|-----------------------|
| <i>hly</i>     | 5'AGCTCATTTACATCGTCCA 3'<br>5'TGGTAAGTTCCGGTCATCAA 3'  | 124                   |
| <i>agrA</i>    | 5'CGGGTACTTGCCTGTATGAA 3'<br>5'TGAATAGTTGGCGCTGTCTC 3' | 149                   |
| <i>degU</i>    | 5'GGCGCGTATATTCATCCAC 3'<br>5'TACCTCGCACTCTCTATGCG 3'  | 150                   |
| <i>prfA</i>    | 5'GGAAGCTTGGCTCTATTTGC 3'<br>5'ACAGCTGAGCTATGTGCGAT 3' | 145                   |
| <i>actA</i>    | 5'AGAAATCATCCGGGAAACAG 3'<br>5'CCTCTCCCGTTCAACTCTTC 3' | 147                   |
| <i>flaA</i>    | 5'GTAAGCATCCAAGCGTCTGA 3'<br>5'AAGAATCAGCATCAGCAACG 3' | 148                   |
| <i>sigB</i>    | 5'TGGTGTCACGGAAGAAGAAG 3'<br>5'TCCGTACCACCAACAACATC 3' | 135                   |
| <i>ltrC</i>    | 5'TACGGCGTCGAT ATACT 3'<br>5'GAATGTGTGAACGGCGATAC 3'   | 144                   |
| <i>sufS</i>    | 5'GAATTTGGCGGAGAAATGAT 3'<br>5'TCTGCCAAGTAATCAATCGC 3' | 137                   |
| <i>sufU</i>    | 5'TTCAGAAATGGTGCAAGGTC 3'<br>5'ATCGCTCTCTCCATTGCTTT 3' | 135                   |
| <i>16S RNA</i> | 5'TTAGCTAGTTGGTAGGGT 3'<br>5'AATCCGGACAACGCTTGC 3'     | 550                   |
